# Supplementary material
Source: PubMed Central journal article supplement (PMC1564248)
Supplement: pnas_0604122103_4.pdf [file pnas_0604122103_4.pdf]

### Supporting Text - Estimate of the drag force.

The drag force at a given point under the rotating object was calculated as

$$\tau = \frac{\mu \cdot r \cdot \omega}{h}, \quad [1]$$

where  $r$  is the distance from center of rotation,  $h$  is the width of the gap between the object and the surface,  $\mu$  is the viscosity of the solution ( $0.84 \times 10^{-3}$  Pa·s), and  $\omega$  is the rotational rate (2 rpm).

(i) *Drag force between a rotating circular rim and a track.*

The total drag torque  $T_1$  is calculated by integrations with the area of the rim that faced the track.

$$\begin{aligned} T_1 &= \int_0^{2\pi} \int_{R_1}^{R_2} r \cdot \left( \frac{\mu \cdot r \cdot \omega}{h} \right) \cdot r \cdot dr \cdot d\theta \\ &= \frac{\pi \cdot \mu \cdot \omega \cdot (R_2^4 - R_1^4)}{2h}, \end{aligned} \quad [2]$$

where  $R_1$  and  $R_2$  represent the radii of the inner and outer edges of the rim, respectively. The calculated drag torque is  $9 \times 10^{-18}$  N·m, assuming that the gap between the rim and the track surface is 50 nm. The drag torque is  $1.8 \times 10^{-16}$  N·m for a 2.5-nm gap.

(ii) *Drag force between a rotating circular disk and a surface.*

The total drag torque between a rotating disk and a surface ( $T_2$ ) is calculated by integration with the area of the disk.

$$T_2 = \frac{\pi \cdot \mu \cdot \omega \cdot R^4}{2h}, \quad [3]$$

where  $R$  is the radius of the disk. The calculated total drag torque is  $6 \times 10^{-18}$  N·m for a 20- $\mu$ m diameter rotor and a 500-nm gap between the rotor and the surface.
