# Supplementary material
Source: PubMed Central journal article supplement (PMC1564248)

A

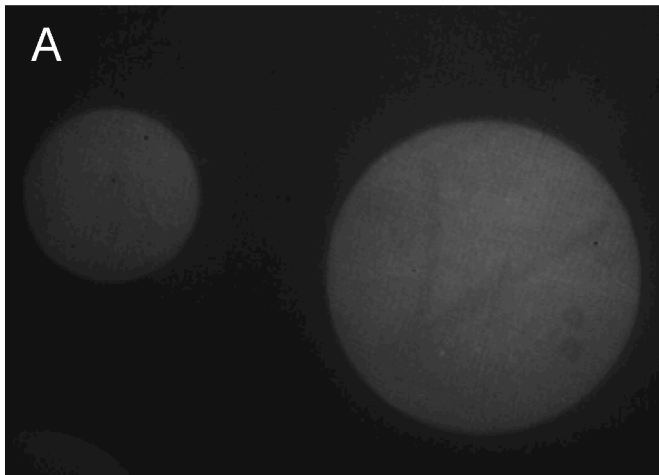

B

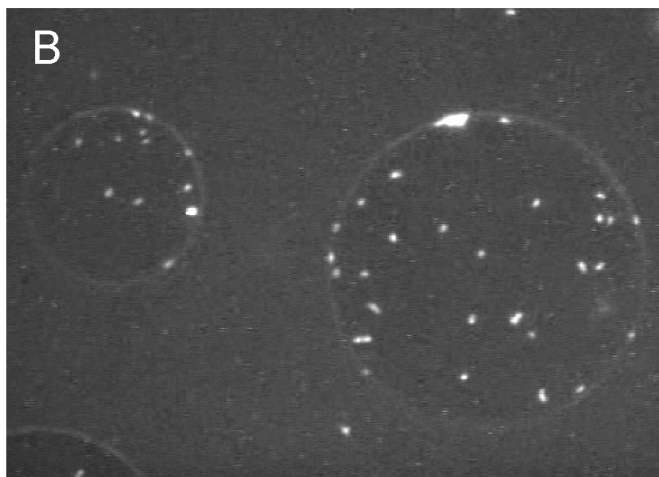

Supplement: pnas_0604122103_1.pdf [file pnas_0604122103_1.pdf]

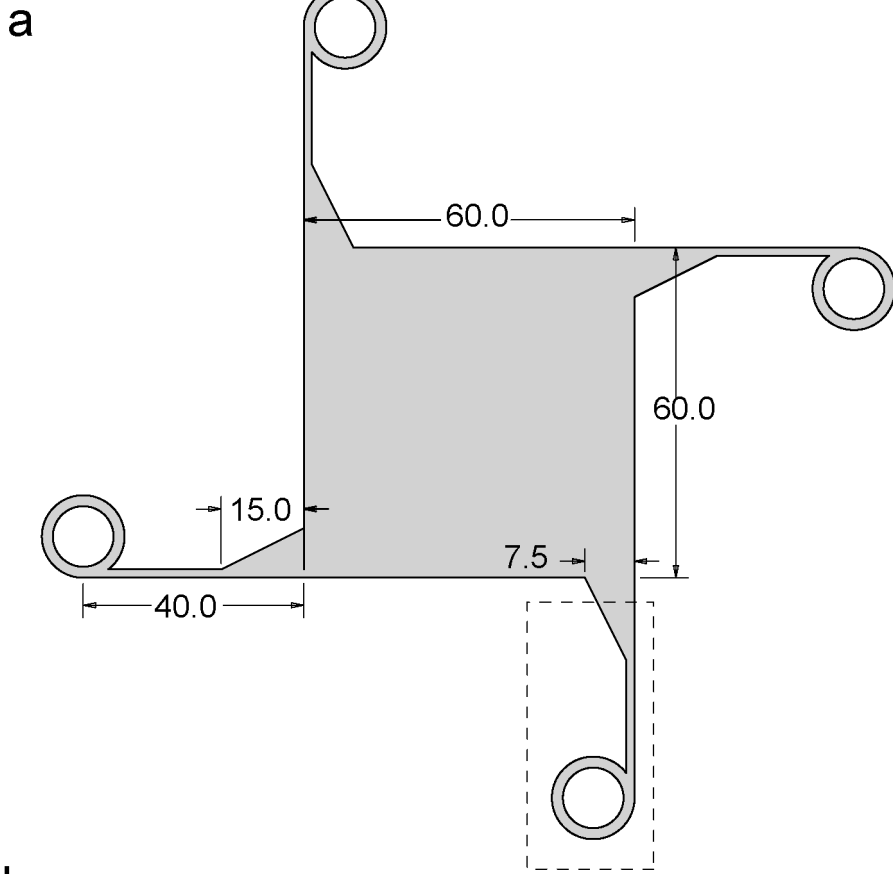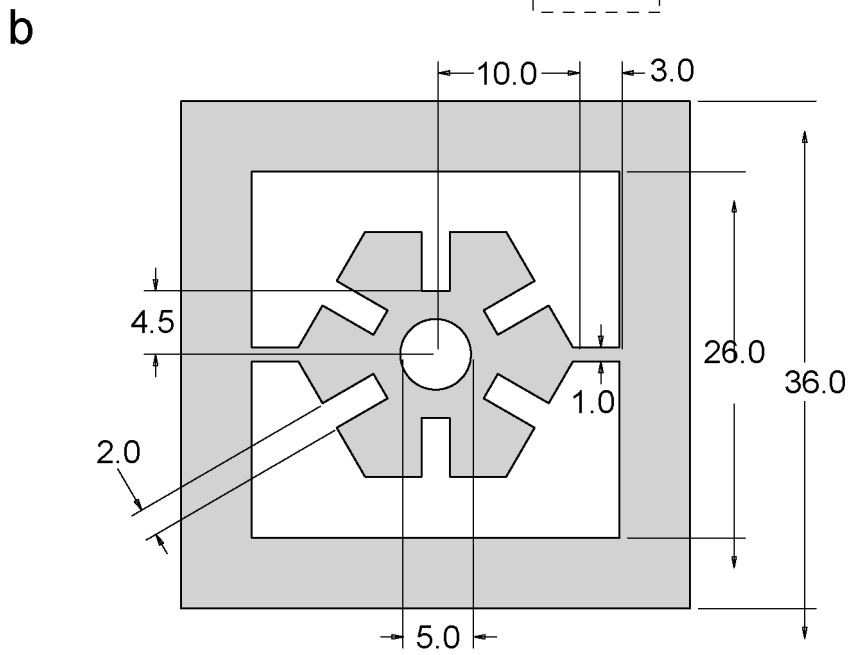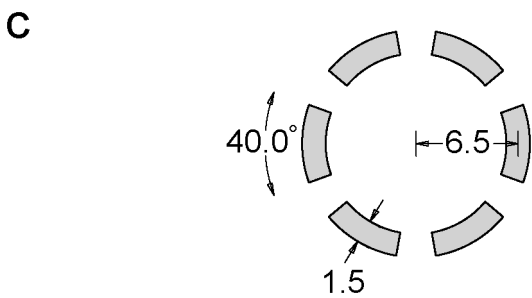

Supplement: pnas_0604122103_2.pdf [file pnas_0604122103_2.pdf]

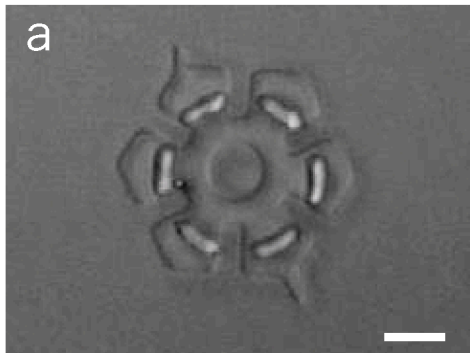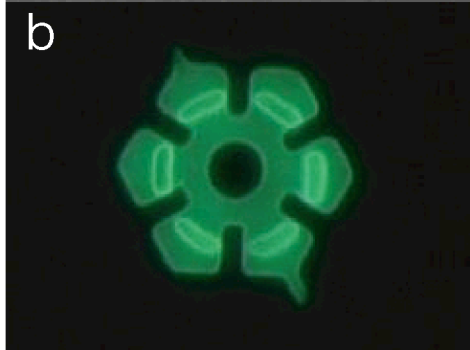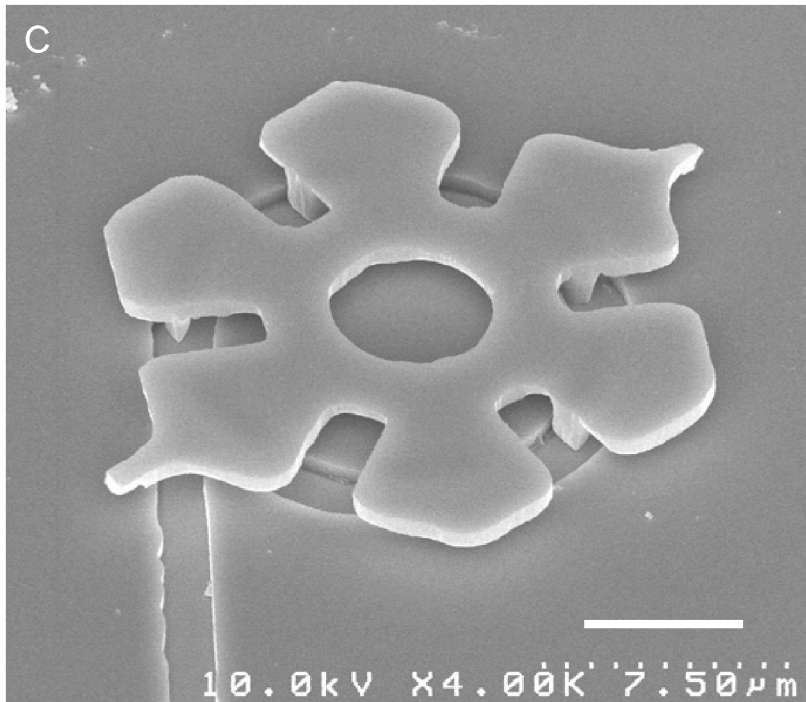

Supplement: pnas_0604122103_3.pdf [file pnas_0604122103_3.pdf]
